# Supplementary material for: Utilization of Yacon Damaged Roots as a Source of FOS-Enriched Sweet-Tasting Syrup
Source: MDPI journal article supplement (doi:10.3390/app14020894), 2024-01-20
Supplement: s1 [file s1]

**Table S1.** Carbohydrate composition (g/kg) of the skin, pulp and whole yacon from the Hualqui and Crespo varieties as determined by HPAEC-PAD without any hydrolysis step. Glc – Glucose; Fru – Fructose, Suc, Sucrose; FOS – Fructooligosaccharides.

| Sugar                      | Hualqui |         |             | Crespo   |          |             |
|----------------------------|---------|---------|-------------|----------|----------|-------------|
|                            | Skin    | Pulp    | Whole Yacon | Skin     | Pulp     | Whole Yacon |
| <b>Glc</b>                 | 49 ± 6  | 79 ± 6  | 73 ± 5      | 44 ± 2   | 40 ± 5   | 41 ± 4      |
| <b>Fru</b>                 | 119 ± 3 | 233 ± 6 | 210 ± 5     | 119 ± 12 | 83 ± 4   | 90 ± 5      |
| <b>Suc</b>                 | 17 ± 0  | 40 ± 2  | 35 ± 1      | 32 ± 0   | 18 ± 1   | 20 ± 1      |
| <b>FOS kesto-type</b>      |         |         |             |          |          |             |
| <i>DP3</i>                 | 11 ± 0  | 37 ± 1  | 32 ± 1      | 13 ± 0   | 8 ± 0    | 9 ± 0       |
| <i>DP4</i>                 | 14 ± 0  | 34 ± 2  | 30 ± 1      | 17 ± 2   | 15 ± 0   | 2 ± 0       |
| <i>DP5</i>                 | 14 ± 0  | 32 ± 1  | 28 ± 1      | 24 ± 1   | 24 ± 0   | 24 ± 0      |
| <i>DP6</i>                 | 8 ± 0   | 18 ± 1  | 16 ± 1      | 19 ± 1   | 24 ± 1   | 23 ± 0      |
| <i>DP7</i>                 | 7 ± 0   | 13 ± 1  | 12 ± 1      | 18 ± 2   | 24 ± 0   | 23 ± 0      |
| <i>DP8</i>                 | 6 ± 0   | 10 ± 1  | 9 ± 0       | 18 ± 1   | 25 ± 1   | 24 ± 1      |
| <i>DP9</i>                 | 5 ± 0   | 8 ± 0   | 7 ± 0       | 20 ± 1   | 26 ± 0   | 25 ± 1      |
| Total                      | 64 ± 1  | 152 ± 4 | 134 ± 3     | 129 ± 8  | 146 ± 1  | 142 ± 1     |
| <b>FOS inulo-type</b>      |         |         |             |          |          |             |
| <i>DP2</i>                 | 1 ± 0   | 3 ± 0   | 3 ± 0       | 7 ± 0    | 5 ± 0    | 1 ± 0       |
| <i>DP3</i>                 | -       | 1 ± 0   | 1 ± 0       | 6 ± 0    | 6 ± 0    | 6 ± 0       |
| <i>DP4</i>                 | -       | -       | -           | 2 ± 0    | 3 ± 0    | 3 ± 0       |
| <i>DP5</i>                 | -       | -       | -           | tr       | -        | tr          |
| <i>DP6</i>                 | -       | -       | -           | -        | -        | -           |
| Total                      | 1 ± 0   | 4 ± 0   | 4 ± 0       | 15 ± 1   | 14 ± 0   | 14 ± 0      |
| <b>Inulin</b>              | 11 ± 0  | 12 ± 1  | 12 ± 0      | 200 ± 8  | 390 ± 12 | 352 ± 11    |
| <b>Total carbohydrates</b> | 260 ± 5 | 520 ± 7 | 468 ± 5     | 539 ± 27 | 692 ± 20 | 661 ± 22    |

**Table S2.** Carbohydrate composition (g/kg) of Hualqui 5% lemon juice, commercial yacon syrup and commercial agave syrup as determined by HPAEC-PAD without any hydrolysis step.

| Sugar                      | Yacon Hualqui<br>5% Lemon juice | Yacon comercial<br>syrup | Agave comercial<br>syrup |
|----------------------------|---------------------------------|--------------------------|--------------------------|
| <b>Glc</b>                 | 155 ± 3                         | 54 ± 5                   | 220 ± 12                 |
| <b>Fru</b>                 | 394 ± 6                         | 518 ± 38                 | 685 ± 53                 |
| <b>Suc</b>                 | 46 ± 2                          | 36 ± 7                   | -                        |
| <b>FOS kesto-type</b>      |                                 |                          |                          |
| DP3                        | 15 ± 1                          | 41 ± 2                   | -                        |
| DP4                        | 20 ± 2                          | 58 ± 4                   | -                        |
| DP5                        | 15 ± 2                          | 53 ± 2                   | -                        |
| DP6                        | 8 ± 1                           | 33 ± 1                   | -                        |
| DP7                        | 4 ± 1                           | 16 ± 2                   | -                        |
| DP8                        | 2 ± 0                           | 12 ± 1                   | -                        |
| DP9                        | 3 ± 1                           | 10 ± 1                   | -                        |
| Total                      | 67 ± 8                          | 223 ± 8                  | -                        |
| <b>FOS Inulo-type</b>      |                                 |                          |                          |
| DP2                        | 9 ± 1                           | 3 ± 0                    | -                        |
| DP3                        | 7 ± 1                           | 2 ± 0                    | -                        |
| DP4                        | 5 ± 1                           | 1 ± 0                    | -                        |
| DP5                        | 2 ± 0                           | 1 ± 1                    | -                        |
| DP6                        | 1 ± 0                           | -                        | -                        |
| Total                      | 23 ± 3                          | 8 ± 2                    | -                        |
| <b>Inulin</b>              |                                 |                          |                          |
| DP10                       | -                               | 6 ± 0                    | -                        |
| DP11                       | -                               | 4 ± 0                    | -                        |
| DP12                       | -                               | 2 ± 0                    | -                        |
| DP13                       | -                               | 1 ± 0                    | -                        |
| DP14                       | -                               | 1 ± 0                    | -                        |
| <b>Total</b>               | -                               | 15 ± 0                   | -                        |
| <b>Total carbohydrates</b> | 687 ± 22                        | 853 ± 46                 | 904 ± 63                 |

**Table S3.** Carbohydrate composition (g/kg) of Hualqui 5% lemon juice and of the hualqui syrups and Crespo syrups produced with citric acid (0.1%, 0.25%, 0.25% and 0.08% ascorbic acid and 0.5%) as determined by HPAEC-PAD without any hydrolysis step.

| Sugar                 | Hualqui        |             |             |                       |             | Crespo      |             |                       |             |             |
|-----------------------|----------------|-------------|-------------|-----------------------|-------------|-------------|-------------|-----------------------|-------------|-------------|
|                       | 5% Lemon juice | 0.1% CitA   | 0.25% CitA  | 0.25% CitA + 0.08% AA | 0.5% CitA   | 0.1% CitA   | 0.25% CitA  | 0.25% CitA + 0.08% AA | 0.5% CitA   |             |
|                       | Atm. Press.    | Atm. Press. | Atm. Press. | Atm. Press.           | Atm. Press. | Atm. Press. | Atm. Press. | Atm. Press.           | Red. Press. | Atm. Press. |
| <b>Glc</b>            | 155 ± 3        | 98 ± 4      | 121 ± 1     | 111 ± 2               | 146 ± 2     | 80 ± 1      | 91 ± 3      | 82 ± 4                | 79 ± 9      | 92 ± 6      |
| <b>Fru</b>            | 394 ± 6        | 288 ± 2     | 358 ± 5     | 267 ± 0               | 445 ± 8     | 183 ± 7     | 220 ± 7     | 202 ± 7               | 172 ± 17    | 333 ± 21    |
| <b>Sucrose</b>        | 46 ± 2         | 50 ± 3      | 52 ± 2      | 50 ± 0                | 32 ± 1      | 34 ± 4      | 22 ± 3      | 18 ± 3                | 32 ± 0      | 36 ± 3      |
| <b>FOS kesto-type</b> |                |             |             |                       |             |             |             |                       |             |             |
| DP3                   | 15 ± 1         | 36 ± 2      | 38 ± 4      | 13 ± 0                | 6 ± 1       | 19 ± 0      | 19 ± 0      | 20 ± 2                | 15 ± 1      | 12 ± 2      |
| DP4                   | 20 ± 2         | 43 ± 3      | 58 ± 7      | 20 ± 2                | 3 ± 1       | 30 ± 1      | 29 ± 0      | 32 ± 1                | 26 ± 1      | 9 ± 1       |
| DP5                   | 15 ± 2         | 48 ± 3      | 57 ± 7      | 12 ± 0                | 1 ± 0       | 46 ± 1      | 44 ± 0      | 46 ± 2                | 46 ± 2      | 11 ± 1      |
| DP6                   | 8 ± 1          | 31 ± 2      | 41 ± 7      | 6 ± 1                 | -           | 43 ± 3      | 37 ± 0      | 40 ± 4                | 42 ± 1      | 7 ± 1       |
| DP7                   | 4 ± 1          | 20 ± 2      | 29 ± 5      | 3 ± 0                 | -           | 43 ± 0      | 35 ± 2      | 35 ± 1                | 40 ± 3      | 4 ± 1       |
| DP8                   | 2 ± 0          | 16 ± 1      | 22 ± 3      | 1 ± 0                 | -           | 43 ± 2      | 26 ± 1      | 24 ± 1                | 37 ± 3      | 7 ± 1       |
| DP9                   | 3 ± 1          | 14 ± 1      | 20 ± 4      | 3 ± 0                 | -           | 41 ± 0      | 40 ± 1      | 41 ± 2                | 34 ± 2      | 5 ± 0       |
| Total                 | 67 ± 8         | 209 ± 13    | 253 ± 18    | 57 ± 1                | 10 ± 2      | 265 ± 2     | 230 ± 2     | 236 ± 12              | 240 ± 10    | 56 ± 1      |
| <b>FOS Inulo-type</b> |                |             |             |                       |             |             |             |                       |             |             |
| DP2                   | 9 ± 1          | 6 ± 0       | 15 ± 1      | 8 ± 0                 | 7 ± 1       | 9 ± 1       | 19 ± 1      | 18 ± 2                | 9 ± 1       | 28 ± 2      |

|        |       |        |        |        |        |        |        |        |        |        |        |
|--------|-------|--------|--------|--------|--------|--------|--------|--------|--------|--------|--------|
| Inulin | DP3   | 7 ± 1  | 4 ± 0  | 12 ± 1 | 6 ± 0  | 4 ± 1  | 9 ± 0  | 15 ± 0 | 20 ± 1 | 8 ± 1  | 22 ± 2 |
|        | DP4   | 5 ± 1  | 2 ± 0  | 7 ± 1  | 3 ± 0  | -      | 5 ± 1  | 13 ± 0 | 18 ± 2 | 3 ± 0  | 17 ± 1 |
|        | DP5   | 2 ± 0  | 1 ± 0  | 4 ± 1  | 1 ± 0  | -      | 4 ± 0  | 12 ± 1 | 15 ± 1 | 2 ± 0  | 12 ± 1 |
|        | DP6   | 1 ± 0  | 1 ± 0  | 3 ± 0  | tr     | -      | -      | 13 ± 1 | 16 ± 1 | 1 ± 0  | 7 ± 0  |
|        | Total | 23 ± 3 | 14 ± 1 | 39 ± 3 | 18 ± 1 | 11 ± 1 | 26 ± 1 | 72 ± 2 | 85 ± 3 | 23 ± 1 | 85 ± 4 |
|        | DP10  | -      | 8 ± 0  | 12 ± 2 | -      | -      | 38 ± 1 | 35 ± 1 | 34 ± 2 | 32 ± 2 | 4 ± 0  |
|        | DP11  | -      | 5 ± 0  | 7 ± 1  | -      | -      | 36 ± 0 | 31 ± 1 | 29 ± 2 | 29 ± 2 | 2 ± 0  |
|        | DP12  | -      | 3 ± 0  | 4 ± 1  | -      | -      | 32 ± 1 | 26 ± 1 | 23 ± 1 | 26 ± 3 | 1 ± 0  |
|        | DP13  | -      | 2 ± 0  | 2 ± 0  | -      | -      | 26 ± 0 | 15 ± 0 | 13 ± 1 | 23 ± 2 | tr     |
|        | DP14  | -      | 1 ± 0  | 1 ± 0  | -      | -      | 19 ± 0 | 9 ± 2  | 8 ± 0  | 20 ± 2 | -      |
|        | DP15  | -      | 1 ± 0  | -      | -      | -      | 15 ± 0 | 6 ± 2  | 4 ± 0  | 18 ± 2 | -      |
|        | DP16  | -      | -      | -      | -      | -      | 13 ± 0 | 6 ± 2  | 4 ± 0  | 16 ± 1 | -      |
|        | DP17  | -      | -      | -      | -      | -      | 12 ± 0 | 7 ± 0  | 6 ± 0  | 14 ± 1 | -      |
|        | DP18  | -      | -      | -      | -      | -      | 10 ± 0 | 6 ± 0  | 5 ± 0  | 13 ± 1 | -      |
|        | DP19  | -      | -      | -      | -      | -      | 8 ± 0  | 5 ± 1  | 4 ± 0  | 11 ± 1 | -      |
|        | DP20  | -      | -      | -      | -      | -      | 6 ± 0  | 3 ± 1  | 3 ± 0  | 9 ± 1  | -      |
|        | DP21  | -      | -      | -      | -      | -      | 4 ± 0  | 2 ± 0  | 2 ± 0  | 8 ± 1  | -      |
|        | DP22  | -      | -      | -      | -      | -      | 3 ± 0  | 1 ± 0  | 1 ± 0  | 7 ± 1  | -      |
|        | DP23  | -      | -      | -      | -      | -      | 2 ± 0  | 1 ± 0  | 1 ± 0  | 5 ± 0  | -      |

|                            |          |          |          |         |         |          |         |          |          |          |
|----------------------------|----------|----------|----------|---------|---------|----------|---------|----------|----------|----------|
| DP24                       | -        | -        | -        | -       | -       | -        | -       | -        | 4 ± 0    | -        |
| DP25                       | -        | -        | -        | -       | -       | -        | -       | -        | 4 ± 0    | -        |
| DP26                       | -        | -        | -        | -       | -       | -        | -       | -        | 3 ± 0    | -        |
| DP27                       | -        | -        | -        | -       | -       | -        | -       | -        | 2 ± 0    | -        |
| DP28                       | -        | -        | -        | -       | -       | -        | -       | -        | 2 ± 0    | -        |
| DP29                       | -        | -        | -        | -       | -       | -        | -       | -        | 1 ± 0    | -        |
| DP30                       | -        | -        | -        | -       | -       | -        | -       | -        | 1 ± 0    | -        |
| DP31                       | -        | -        | -        | -       | -       | -        | -       | -        | 1 ± 0    | -        |
| <b>Total</b>               | -        | 18 ± 1   | 25 ± 2   | -       | -       | 226 ± 2  | 153 ± 6 | 135 ± 6  | 251 ± 20 | 8 ± 1    |
| <b>Total carbohydrates</b> | 687 ± 22 | 677 ± 23 | 817 ± 50 | 503 ± 2 | 643 ± 9 | 820 ± 11 | 787 ± 0 | 759 ± 28 | 797 ± 49 | 609 ± 22 |

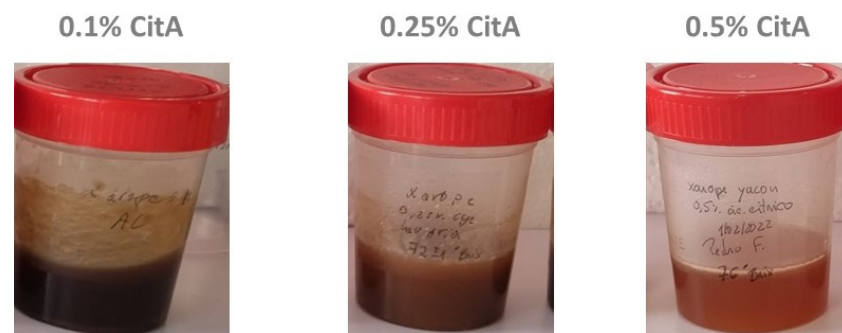

**Figure S1** – Color of the Crespo syrups made que 0.1% citric acid, 0.25% citric acid, and 0.5% citric acid.
